# Supplementary material for: Prospective Associations of Serum Adiponectin, Leptin, and Leptin-Adiponectin Ratio with Incidence of Metabolic Syndrome: The Korean Genome and Epidemiology Study
Source: PubMed Central journal article supplement (PMC7246697; doi:10.3390/ijerph17093287), 2020-05-08
Supplement: ijerph-17-03287-s001.pdf [file ijerph-17-03287-s001.pdf]

**Supplementary Table S1.** Characteristics of the study participants according to adiponectin levels in Korean men and women aged 45–76 years.

|                                      | Men                                 |                   |                           |                | Women                    |                    |                           |         |
|--------------------------------------|-------------------------------------|-------------------|---------------------------|----------------|--------------------------|--------------------|---------------------------|---------|
|                                      | Tertile of Adiponectin <sup>1</sup> |                   |                           | P <sup>3</sup> | Tertile of Adiponectin   |                    |                           | P       |
|                                      | T1 (Lowest)<br>(n = 439)            | T2<br>(n = 439)   | T3 (Highest)<br>(n = 439) |                | T1 (Lowest)<br>(n = 458) | T2<br>(n = 458)    | T3 (Highest)<br>(n = 458) |         |
| Age (years)                          | 54.33 ± 7.27 <sup>2</sup>           | 56.33 ± 8.29      | 59.57 ± 8.89              | <0.0001        | 52.96 ± 6.91             | 53.91 ± 7.06       | 56.90 ± 8.34              | <0.0001 |
| Area of residence                    |                                     |                   |                           | <0.0001        |                          |                    |                           | <0.0001 |
| Ansan                                | 153 (34.85)                         | 169 (38.50)       | 224 (51.03)               |                | 138 (30.13)              | 161 (35.15)        | 217 (47.38)               |         |
| Ansung                               | 286 (65.15)                         | 270 (61.50)       | 215 (48.97)               |                | 320 (69.87)              | 297 (64.85)        | 241 (52.62)               |         |
| Education level                      |                                     |                   |                           | <0.0001        |                          |                    |                           | <0.0001 |
| ≤elementary school                   | 44 (10.02)                          | 75 (17.08)        | 103 (23.46)               |                | 101 (22.05)              | 107 (23.36)        | 169 (36.90)               |         |
| middle/high school                   | 280 (63.78)                         | 254 (57.86)       | 779 (55.81)               |                | 302 (65.94)              | 308 (67.25)        | 259 (56.55)               |         |
| ≥college                             | 115 (26.20)                         | 110 (25.06)       | 316 (20.73)               |                | 55 (12.01)               | 43 (9.39)          | 30 (6.55)                 |         |
| Smoking status                       |                                     |                   |                           | 0.0271         |                          |                    |                           | 0.0450  |
| Never                                | 107 (24.37)                         | 124 (28.25)       | 131 (29.84)               |                | 446 (97.38)              | 453 (98.91)        | 453 (98.91)               |         |
| Past                                 | 162 (36.90)                         | 187 (42.60)       | 165 (27.59)               |                | 3 (0.66)                 | 3 (0.66)           | 2 (0.44)                  |         |
| Current                              | 170 (38.72)                         | 128 (29.16)       | 143 (32.57)               |                | 9 (1.97)                 | 2 (0.44)           | 3 (0.66)                  |         |
| Alcohol consumption<br>(grams/day)   | 10.13 (0.95–26.05)                  | 5.79 (0.00–22.07) | 3.80 (0.00–18.81)         | <0.0001        | 0.00 (0.00–0.58)         | 0.00 (0.00–0.57)   | 0.00 (0.00–0.29)          | 0.4771  |
| Regular physical activity            |                                     |                   |                           | 0.0993         |                          |                    |                           | 0.0815  |
| Yes                                  | 192 (43.74)                         | 176 (40.09)       | 168 (38.27)               |                | 194 (42.36)              | 210 (45.85)        | 168 (36.68)               |         |
| No                                   | 247 (56.26)                         | 263 (59.91)       | 271 (61.73)               |                | 264 (57.64)              | 248 (54.15)        | 290 (63.32)               |         |
| Family history of diabetes           |                                     |                   |                           | 0.0024         |                          |                    |                           | 0.0752  |
| Yes                                  | 12 (2.73)                           | 7 (1.59)          | 1 (0.23)                  |                | 15 (3.28)                | 9 (1.97)           | 7 (1.53)                  |         |
| No                                   | 427 (97.27)                         | 432 (98.41)       | 438 (99.77)               |                | 443 (96.72)              | 449 (98.03)        | 451 (98.47)               |         |
| Body mass index (kg/m <sup>2</sup> ) | 1.66 ± 3.20                         | 1.75 ± 5.64       | 1.47 ± 4.15               | 0.6259         | 1.49 ± 7.02              | 1.02 ± 2.20        | 1.07 ± 3.99               | 0.2681  |
| hs-CRP (mg/dL) <sup>4</sup>          | 0.73 (0.39–1.57)                    | 0.61 (0.32–1.38)  | 0.51 (0.28–1.15)          | <0.0001        | 0.60 (0.32–1.15)         | 0.43 (0.26–0.83)   | 0.39 (0.24–0.72)          | <0.0001 |
| Adiponectin (μg/mL) <sup>4</sup>     | 3.51 (2.98–3.99)                    | 5.08 (4.76–5.50)  | 7.28 (6.50–8.29)          | <0.0001        | 4.70 (3.97–5.30)         | 6.87 (6.34–7.49)   | 9.64 (8.69–11.25)         | <0.0001 |
| Leptin (ng/mL) <sup>4</sup>          | 2.64 (1.61–3.93)                    | 2.26 (1.07–3.73)  | 1.39 (1.01–2.69)          | <0.0001        | 11.41 (7.76–16.3)        | 10.01 (6.64–14.86) | 7.65 (4.90–12.03)         | <0.0001 |
| LA ratio (ng/μg) <sup>4</sup>        | 0.80 (0.48–1.20)                    | 0.44 (0.22–0.73)  | 0.18 (0.14–0.36)          | <0.0001        | 2.58 (1.66–3.87)         | 1.46 (0.94–2.17)   | 0.76 (0.46–1.23)          | <0.0001 |
| MetS components, n (%)               |                                     |                   |                           |                |                          |                    |                           |         |
| Abdominal obesity                    | 46 (10.48)                          | 52 (11.85)        | 33 (7.52)                 | 0.1428         | 63 (13.76)               | 51 (11.14)         | 66 (14.41)                | 0.7690  |
| Elevated BP                          | 105 (23.92)                         | 118 (26.88)       | 108 (24.60)               | 0.8155         | 64 (13.97)               | 83 (18.12)         | 109 (23.8)                | 0.0001  |
| Elevated FBG                         | 93 (21.18)                          | 68 (15.49)        | 74 (16.86)                | 0.0941         | 33 (7.21)                | 23 (5.02)          | 14 (3.06)                 | 0.0043  |
| Elevated TG                          | 129 (29.38)                         | 73 (16.63)        | 35 (7.97)                 | <0.0001        | 78 (17.03)               | 37 (8.08)          | 22 (4.8)                  | <0.0001 |
| Low HDL-C                            | 151 (34.40)                         | 119 (27.11)       | 81 (18.45)                | <0.0001        | 308 (67.25)              | 232 (50.66)        | 191 (41.7)                | <0.0001 |

|                                    |             |             |             |         |             |             |             |         |
|------------------------------------|-------------|-------------|-------------|---------|-------------|-------------|-------------|---------|
| No. of MetS components at baseline |             |             |             | <0.0001 |             |             |             | <0.0001 |
| 0                                  | 84 (19.13)  | 132 (30.07) | 185 (42.14) |         | 78 (17.03)  | 137 (29.91) | 162 (35.37) |         |
| 1                                  | 186 (42.37) | 184 (41.91) | 177 (40.32) |         | 214 (46.72) | 216 (47.16) | 190 (41.48) |         |
| 2                                  | 169 (38.50) | 123 (28.02) | 77 (17.54)  |         | 166 (36.24) | 105 (22.93) | 106 (23.14) |         |

T, tertile; hs-CRP, high-sensitivity C-reactive protein; LA ratio, leptin-adiponectin ratio; MetS, metabolic syndrome; BP, blood pressure; FBG, fasting blood glucose; TG, triglyceride; HDL-C, high-density lipoprotein cholesterol. <sup>1</sup> Cut-offs for tertiles 1–3 of adiponectin levels as follows: <4.35, 4.35–5.94, and >5.94 µg/mL in men and <5.88, 5.88–8.09, and >8.09 µg/mL in women, respectively. <sup>2</sup> Values are number (percentage) for categorical variables and mean ± standard deviation for continuous variables. <sup>3</sup> P values based on chi-square tests for categorical variables and generalized linear regressions for continuous variables. <sup>4</sup> Values are presented as the median (lower quartile-upper quartile), and the P values were from the Kruskal–Wallis tests.

**Supplementary Table S2.** Characteristics of the study participants according to leptin levels in Korean men and women aged 45–76 years.

|                                      | Men                            |                   |                           | P <sup>3</sup> | Women                    |                  |                           | P       |
|--------------------------------------|--------------------------------|-------------------|---------------------------|----------------|--------------------------|------------------|---------------------------|---------|
|                                      | Tertile of Leptin <sup>1</sup> |                   |                           |                | Tertile of Leptin        |                  |                           |         |
|                                      | T1 (Lowest)<br>(n = 439)       | T2<br>(n = 439)   | T3 (Highest)<br>(n = 439) |                | T1 (Lowest)<br>(n = 458) | T2<br>(n = 458)  | T3 (Highest)<br>(n = 458) |         |
| Age (years)                          | 58.35 ± 8.47 <sup>2</sup>      | 56.35 ± 8.38      | 55.53 ± 8.28              | <0.0001        | 59.07 ± 8.53             | 56.63 ± 8.51     | 54.53 ± 7.68              | <0.0001 |
| Area of residence                    |                                |                   |                           | <0.0001        |                          |                  |                           | <0.0001 |
| Ansan                                | 253 (57.63)                    | 168 (38.27)       | 125 (28.47)               |                | 245 (55.81)              | 180 (41.00)      | 121 (27.56)               |         |
| Ansung                               | 186 (42.37)                    | 271 (61.73)       | 314 (71.53)               |                | 194 (44.19)              | 259 (59.00)      | 318 (72.44)               |         |
| Education level                      |                                |                   |                           | <0.0001        |                          |                  |                           | <0.0001 |
| ≤elementary school                   | 102 (23.23)                    | 68 (15.49)        | 52 (11.85)                |                | 102 (23.23)              | 82 (18.68)       | 38 (8.66)                 |         |
| middle/high school                   | 255 (58.09)                    | 274 (62.41)       | 250 (56.95)               |                | 260 (59.23)              | 254 (57.86)      | 265 (60.36)               |         |
| ≥college                             | 82 (18.68)                     | 97 (22.10)        | 137 (31.21)               |                | 77 (17.54)               | 103 (23.46)      | 136 (30.98)               |         |
| Smoking status                       |                                |                   |                           | 0.0001         |                          |                  |                           | 0.0688  |
| Never                                | 105 (23.92)                    | 133 (30.30)       | 124 (28.25)               |                | 114 (25.97)              | 134 (30.52)      | 114 (25.97)               |         |
| Past                                 | 153 (34.85)                    | 158 (35.99)       | 203 (46.24)               |                | 151 (34.40)              | 170 (38.72)      | 193 (43.96)               |         |
| Current                              | 181 (41.23)                    | 148 (33.71)       | 112 (25.51)               |                | 174 (39.64)              | 135 (30.75)      | 132 (30.07)               |         |
| Alcohol consumption (grams/day)      | 4.70 (0.00–18.81)              | 7.52 (0.00–22.43) | 7.52 (0.00–24.02)         | 0.1026         | 0.00 (0.00–0.29)         | 0.00 (0.00–0.62) | 0.00 (0.00–0.00)          | 0.2697  |
| Regular physical activity            |                                |                   |                           | 0.0111         |                          |                  |                           | 0.006   |
| Yes                                  | 157 (35.76)                    | 185 (42.14)       | 194 (44.19)               |                | 161 (36.67)              | 174 (39.64)      | 201 (45.79)               |         |
| No                                   | 282 (64.24)                    | 254 (57.86)       | 245 (55.81)               |                | 278 (63.33)              | 265 (60.36)      | 238 (54.21)               |         |
| Family history of diabetes           |                                |                   |                           | 0.5811         |                          |                  |                           | 0.0535  |
| Yes                                  | 5 (1.14)                       | 8 (1.82)          | 7 (1.59)                  |                | 3 (0.68)                 | 7 (1.59)         | 10 (2.28)                 |         |
| No                                   | 434 (98.86)                    | 431 (98.18)       | 432 (98.41)               |                | 436 (99.32)              | 432 (98.41)      | 429 (97.72)               |         |
| Body mass index (kg/m <sup>2</sup> ) | 21.10 ± 2.07                   | 23.31 ± 1.77      | 24.78 ± 2.11              | <0.0001        | 21.16 ± 2.04             | 23.20 ± 1.87     | 24.83 ± 2.07              | <0.0001 |

|                                    |                  |                  |                  |         |                  |                   |                     |         |
|------------------------------------|------------------|------------------|------------------|---------|------------------|-------------------|---------------------|---------|
| hs-CRP (mg/dL) <sup>4</sup>        | 0.50 (0.28–1.20) | 0.56 (0.32–1.19) | 0.79 (0.42–1.59) | <0.0001 | 0.35 (0.22–0.65) | 0.43 (0.26–0.80)  | 0.62 (0.37–1.16)    | <0.0001 |
| Adiponectin (µg/mL) <sup>4</sup>   | 5.93 (4.79–7.46) | 4.91 (3.70–6.22) | 4.58 (3.78–5.78) | <0.0001 | 7.93 (6.04–9.92) | 6.69 (5.26–8.40)  | 6.20 (4.80–7.91)    | <0.0001 |
| Leptin (ng/mL) <sup>4</sup>        | 1.01 (1.01–1.01) | 2.10 (1.72–2.50) | 2.99 (3.50–5.76) | <0.0001 | 5.13 (3.48–6.23) | 9.74 (8.47–11.12) | 17.12 (14.52–21.23) | <0.0001 |
| LA ratio (ng/µg) <sup>4</sup>      | 0.18 (0.14–0.22) | 0.43 (0.31–0.58) | 0.98 (0.72–1.40) | <0.0001 | 0.65 (0.40–0.85) | 1.47 (1.10–1.86)  | 2.80 (2.14–3.97)    | <0.0001 |
| MetS components, n (%)             |                  |                  |                  |         |                  |                   |                     |         |
| Abdominal obesity                  | 7 (1.59)         | 31 (7.06)        | 93 (21.18)       | <0.0001 | 23 (5.02)        | 54 (11.79)        | 103 (22.49)         | <0.0001 |
| Elevated BP                        | 93 (21.18)       | 125 (28.47)      | 113 (25.74)      | 0.1198  | 94 (20.52)       | 76 (16.59)        | 86 (18.78)          | 0.4974  |
| Elevated FBG                       | 59 (13.44)       | 81 (18.45)       | 95 (21.64)       | 0.0015  | 17 (3.71)        | 24 (5.24)         | 29 (6.33)           | 0.0715  |
| Elevated TG                        | 46 (10.48)       | 76 (17.31)       | 115 (26.20)      | <0.0001 | 21 (4.59)        | 48 (10.48)        | 68 (14.85)          | <0.0001 |
| Low HDL-C                          | 101 (23.01)      | 125 (28.47)      | 125 (28.47)      | 0.0671  | 226 (49.34)      | 270 (58.95)       | 235 (51.31)         | 0.5513  |
| No. of MetS components at baseline |                  |                  |                  | <0.0001 |                  |                   |                     | <0.0001 |
| 0                                  | 200 (45.56)      | 126 (28.70)      | 75 (17.08)       |         | 163 (35.59)      | 111 (24.24)       | 103 (22.49)         |         |
| 1                                  | 172 (39.18)      | 188 (42.82)      | 187 (42.60)      |         | 209 (45.63)      | 222 (48.47)       | 189 (41.27)         |         |
| 2                                  | 67 (15.26)       | 125 (28.47)      | 177 (40.32)      |         | 86 (18.78)       | 125 (27.29)       | 166 (36.24)         |         |

T, tertile; hs-CRP, high-sensitivity C-reactive protein; LA ratio, leptin-adiponectin ratio; MetS, metabolic syndrome; BP, blood pressure; FBG, fasting blood glucose; TG, triglyceride; HDL-C, high-density lipoprotein cholesterol. <sup>1</sup> Cut-offs for tertiles 1-3 of leptin levels as follows: <1.38, 1.38–2.91, and >2.91 ng/mL in men and <7.36, 7.36–12.63, and >12.63 ng/mL in women, respectively. <sup>2</sup> Values are number (percentage) for categorical variables and mean ± standard deviation for continuous variables. <sup>3</sup> P values based on chi-square tests for categorical variables and generalized linear regressions for continuous variables. <sup>4</sup> Values are presented as the median (lower quartile-upper quartile), and the P values were from the Kruskal–Wallis tests.

**Supplementary Table S3.** Adjusted hazard ratios (with 95% confidence intervals) for each component of metabolic syndrome according to baseline serum adiponectin, leptin levels, and leptin-adiponectin ratio in Korean men aged 45–76 years.<sup>1</sup>

| MetS Components   | Tertile     |                               |                  | <i>P</i> <sub>trend</sub> <sup>2</sup> |
|-------------------|-------------|-------------------------------|------------------|----------------------------------------|
|                   | T1 (Lowest) | T2                            | T3 (Highest)     |                                        |
|                   | HR (95% CI) | HR (95% CI)                   | HR (95% CI)      |                                        |
| Adiponectin       |             |                               |                  |                                        |
| Abdominal obesity | 1.00        | 0.69 (0.47–1.02) <sup>1</sup> | 0.91 (0.61–1.37) | <0.0001                                |
| Elevated BP       | 1.00        | 1.24 (0.94–1.65)              | 0.94 (0.68–1.30) | 0.0002                                 |
| Elevated FBG      | 1.00        | 1.00 (0.74–1.35)              | 0.88 (0.63–1.22) | 0.0007                                 |
| Elevated TG       | 1.00        | 0.67 (0.45–0.99)              | 0.65 (0.44–0.96) | 0.0725                                 |
| Low HDL-C         | 1.00        | 0.64 (0.45–0.92)              | 0.53 (0.36–0.78) | 0.0035                                 |
| Leptin            |             |                               |                  |                                        |
| Abdominal obesity | 1.00        | 1.42 (0.84–2.38)              | 2.65 (1.56–4.51) | <0.0001                                |
| Elevated BP       | 1.00        | 1.22 (0.88–1.70)              | 1.56 (1.08–2.25) | 0.0001                                 |
| Elevated FBG      | 1.00        | 1.55 (1.09–2.20)              | 1.86 (1.26–2.76) | <0.0001                                |
| Elevated TG       | 1.00        | 1.68 (1.10–2.58)              | 2.43 (1.47–4.02) | <0.0001                                |
| Low HDL-C         | 1.00        | 2.28 (1.47–3.56)              | 2.59 (1.58–4.25) | <0.0001                                |
| LA ratio          |             |                               |                  |                                        |
| Abdominal obesity | 1.00        | 1.67 (1.00–2.81)              | 2.40 (1.40–4.10) | 0.0046                                 |
| Elevated BP       | 1.00        | 1.35 (0.97–1.86)              | 1.32 (0.90–1.94) | 0.1921                                 |
| Elevated FBG      | 1.00        | 1.33 (0.95–1.87)              | 1.63 (1.10–2.41) | 0.0491                                 |
| Elevated TG       | 1.00        | 1.59 (1.07–2.36)              | 1.61 (0.97–2.67) | 0.0620                                 |
| Low HDL-C         | 1.00        | 2.03 (1.32–3.11)              | 2.63 (1.60–4.32) | 0.0005                                 |

MetS, metabolic syndrome; T, tertile; HR, hazard ratio; CI, confidence interval; BP, blood pressure; FBG, fasting blood glucose; TG, triglyceride; HDL-C, high-density lipoprotein cholesterol, LA ratio, leptin-adiponectin ratio; BMI, body mass index; hs-CRP, high-sensitivity C-reactive protein. <sup>1</sup> Model was adjusted for age (years), area of residence (Ansan or Ansong), education level (≤elementary school, middle/high school, or ≥college), smoking status (never, past, or current), alcohol consumption (g/day), regular physical activity (yes or no), BMI (kg/m<sup>2</sup>), family history of diabetes (yes or no), and serum hs-CRP level (mg/L). <sup>2</sup> Tests for trend linearity were conducted with the Wald test by considering the median values of each tertile of adiponectin, leptin, and LA ratio as continuous variables in the analytical models.

**Supplementary Table S4.** Adjusted hazard ratios (with 95% confidence intervals) for each component of metabolic syndrome according to baseline serum adiponectin, leptin levels, and leptin-adiponectin ratio in Korean women aged 45–76 years.<sup>1</sup>

| MetS Components   | Tertile     |                  |                  | <i>P</i> <sub>trend</sub> <sup>2</sup> |
|-------------------|-------------|------------------|------------------|----------------------------------------|
|                   | T1 (Lowest) | T2               | T3 (Highest)     |                                        |
|                   | HR (95% CI) | HR (95% CI)      | HR (95% CI)      |                                        |
| Adiponectin       |             |                  |                  |                                        |
| Abdominal obesity | 1.00        | 0.93 (0.70–1.23) | 0.83 (0.61–1.13) | 0.0002                                 |
| Elevated BP       | 1.00        | 1.10 (0.82–1.48) | 0.81 (0.59–1.11) | <0.0001                                |
| Elevated FBG      | 1.00        | 0.99 (0.72–1.35) | 0.76 (0.54–1.07) | <0.0001                                |
| Elevated TG       | 1.00        | 0.75 (0.57–0.99) | 0.42 (0.30–0.58) | 0.0005                                 |
| Low HDL-C         | 1.00        | 0.73 (0.42–1.26) | 0.60 (0.34–1.04) | 0.0016                                 |
| Leptin            |             |                  |                  |                                        |
| Abdominal obesity | 1.00        | 1.28 (0.90–1.81) | 1.96 (1.34–2.87) | 0.0889                                 |
| Elevated BP       | 1.00        | 1.41 (1.00–1.97) | 1.55 (1.06–2.27) | 0.0459                                 |
| Elevated FBG      | 1.00        | 1.51 (1.05–2.16) | 1.29 (0.85–1.95) | 0.0316                                 |

|                   |      |                  |                  |         |
|-------------------|------|------------------|------------------|---------|
| Elevated TG       | 1.00 | 1.25 (0.90–1.74) | 1.44 (0.99–2.08) | 0.0163  |
| Low HDL-C         | 1.00 | 1.13 (0.67–1.91) | 0.98 (0.54–1.81) | 0.0371  |
| LA ratio          |      |                  |                  |         |
| Abdominal obesity | 1.00 | 1.39 (0.98–1.97) | 1.85 (1.25–2.74) | 0.0081  |
| Elevated BP       | 1.00 | 1.30 (0.93–1.81) | 1.50 (1.03–2.18) | 0.1007  |
| Elevated FBG      | 1.00 | 1.35 (0.94–1.94) | 1.39 (0.92–2.09) | 0.2104  |
| Elevated TG       | 1.00 | 1.58 (1.11–2.24) | 2.49 (1.71–3.65) | <0.0001 |
| Low HDL-C         | 1.00 | 1.17 (0.71–1.92) | 1.24 (0.67–2.31) | 0.7637  |

MetS, metabolic syndrome; T, tertile; HR, hazard ratio; CI, confidence interval; BP, blood pressure; FBG, fasting blood glucose; TG, triglyceride; HDL-C, high-density lipoprotein cholesterol, LA ratio, leptin-adiponectin ratio; BMI, body mass index; hs-CRP, high-sensitivity C-reactive protein. <sup>1</sup> Model was adjusted for age (years), area of residence (Ansan or Ansong), education level ( $\leq$  elementary school, middle/high school, or  $\geq$  college), smoking status (never, past, or current), alcohol consumption (g/day), regular physical activity (yes or no), BMI (kg/m<sup>2</sup>), family history of diabetes (yes or no), and serum hs-CRP level (mg/L). <sup>2</sup> Tests for trend linearity were conducted with the Wald test by considering the median values of each tertile of adiponectin, leptin, and LA ratio as continuous variables in the analytical models.
